# Supplementary material for: Risk Factors for Cholecystectomy After Laparoscopic Roux-En-Y Gastric Bypass
Source: Springer Nature journal article supplement (doi:10.1007/s11695-019-04166-y), 2019-11-19
Supplement: MOESM1 [file 17405998]

| **Supplementary Table 1: Multivariable association between patient characteristics (including use of statins), and cholecystectomy; all patients (n=699)** | | | | |
| --- | --- | --- | --- | --- |
|  | **Full model** | | **Final model** | |
| **OR (95% CI)** | **p value** | **OR (95% CI)** | **p value** |
| **Age in years, mean ± SD** | 0.98 (0.96-1.00) | 0.013 | 0.98 (0.96-0.99) | 0.006 |
| **Female, n (%)** | 1.73 (0.99-3.02) | 0.053 | 1.76 (1.01-3.06) | 0.045 |
| **Caucasian, n (%)** | 1.82 (1.10-3.02) | 0.020 | 1.83 (1.11-3.03) | 0.018 |
| **Physical active preoperative, n (%)** | 0.99 (0.66-1.47) | 0.942 | - | - |
| **Preoperative BMI in kg/m2, mean ± SD** | 0.99 (0.95-1.02) | 0.449 | - | - |
| **%TWL at 12 months, mean ± SD** | 1.07 (1.04-1.09) | <0.001 | 1.06 (1.04-1.09) | <0.001 |
| **Hypertension preoperative, n (%)** | 0.91 (0.63-1.32) | 0.629 | - | - |
| **Type 2 diabetes preoperative, n (%)** | 1.08 (0.64-1.82) | 0.787 | - | - |
| **Pain syndrome preoperative, n (%)** | 2.60 (1.36-4.97) | 0.004 | 2.68 (1.41-5.11) | 0.003 |
| **Preoperative use of statins, n (%)**   - **No** - **Low intensity** - **Moderate intensity** - **High intensity** | Reference  0.93 (0.37-2.32)  0.58 (0.25-1.34)  0.11 (0.01-0.88) | 0.135*  0.875  0.204  0.038 | Reference  0.94 (0.39-2.25)  0.60 (0.27-1.33)  0.11 (0.02-0.87) | 0.125#  0.886  0.207  0.036 |
| OR: odds ratio, CI: confidence interval, SD: standard deviation, BMI: Body Mass Index, TWL: Total weight loss.  *We also performed a test for trend in the full model: OR [95%CI] 0.66 [0.48-0.93] p value 0.016  # We also performed a test for trend in the final model: OR [95%CI] 0.68 [0.50-0.92] p value 0.013 | | | | |

| **Supplementary Table 2: Multivariable association between patient characteristics and cholecystectomy; female patients (n=590)** | | | | |
| --- | --- | --- | --- | --- |
|  | **Full model** | | **Final model** | |
| **OR (95% CI)** | **p value** | **OR (95% CI)** | **p value** |
| **Age in years, mean ± SD** | 0.97 (0.94-0.99) | 0.016 | 0.97 (0.96-0.99) | 0.007 |
| **Fertile, n (%)** | 0.76 (0.40-1.47) | 0.420 | - | - |
| **Caucasian, n (%)** | 1.98 (1.15-3.42) | 0.014 | 1.99 (1.16-3.39) | 0.012 |
| **Having children, n (%)** | 1.45 (0.90-2.35) | 0.130 | - | - |
| **Physical active preoperative, n (%)** | 1.06 (0.69-1.62) | 0.796 | - | - |
| **Preoperative BMI in kg/m2, mean ± SD** | 0.99 (0.95-1.03) | 0.648 | - | - |
| **%TWL at 12 months, mean ± SD** | 1.07 (1.04-1.10) | <0.001 | 1.07 (1.104-1.10) | <0.001 |
| **Hypertension preoperative, n (%)** | 0.94 (0.63-1.39) | 0.749 | - | - |
| **Type 2 diabetes preoperative, n (%)** | 1.15 (0.65-2.05) | 0.630 | - | - |
| **Pain syndrome preoperative, n (%)** | 2.73 (1.42-5.28) | 0.003 | 2.71 (1.41-5.18) | 0.003 |
| **Preoperative use of statins, n (%)** | 0.51 (0.25-1.04) | 0.064 | 0.50 (0.26-0.97) | 0.040 |
| **Preoperative use of birth control pills, n (%)** | 1.36 (0.88-2.10) | 0.164 | - | - |
| OR: odds ratio, CI: confidence interval, SD: standard deviation, BMI: Body Mass Index, TWL: Total weight loss. | | | | |
